# Supplementary material
Source: PubMed Central journal article supplement (PMC11115804)
Supplement: 18_2009_9179_MOESM1_ESM.pdf [file 18_2009_9179_MOESM1_ESM.pdf]

## Electronic supplementary material

### Supplemental Figure

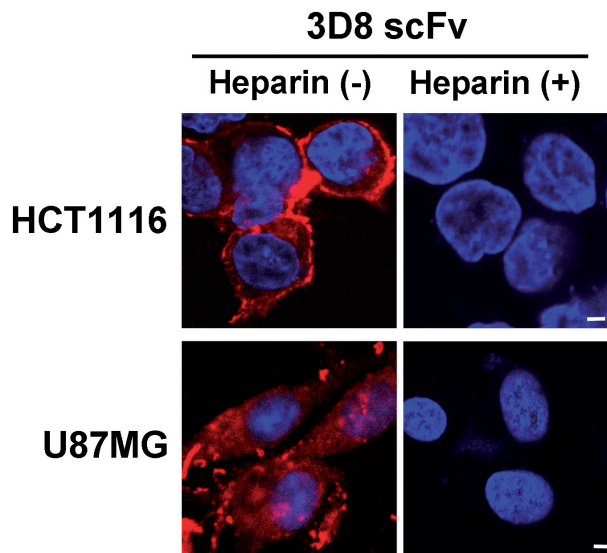

**Figure S1.** Inhibition of 3D8 scFv internalization by soluble heparin treatment in HCT1116 and U87MG cells. Cells were incubated with 3D8 scFv (10  $\mu$ M) for 2 h with or without pre-treatment of soluble heparin (100 IU/ml) for 30 min. Blue color depicts Hoechst 33342-stained nuclei. Scale bar, 5  $\mu$ m.
